# Supplementary material
Source: Research Square preprint supplement (doi:10.21203/rs.3.rs-9002625/v1)

**Ancient coastal forests reborn as modern marine blue carbon ecosystems**

Mario Lebrato1,2,*, Jack Shannon3, Theo Russell4, Alexandra Jordan5,6, Mauro Jije-Goncalves1,2, Maria da Graca1,2, Michelle Caputo7, and Ashlee Lillis8

1 BCSS Ocean Observatory. Bazaruto Center for Scientific Studies (BCSS), Benguerra Island, Mozambique.

2 Kisawa Sanctuary. Benguerra Island, Mozambique

3 University of Southampton, Southampton, UK.

4 University of Plymouth, Plymouth, UK.

5 Heriot-Watt University, Edinburgh, Scotland.

6 Newcastle University, Newcastle upon Tyne, UK.

7 School of Marine and Environmental Programs, University of New England, Maine, USA.

8 Sound Ocean Science, Gqeberha, South Africa.

**Keyword:** peatland, coastal forest, sea level rise, nursery habitat, blue carbon

***Corresponding Author:**

Address: BCSS Ocean Observatory. Bazaruto Center for Scientific Studies (BCSS), Benguerra Island, Mozambique.

E-mail: mario.lebrato@bcssmz.org

Telephone: +34 610 67 77 42

**Supplementary materials**

**Figure S1. Calibrated radiocarbon age distributions of peat reef samples (examples).** Each panel shows the calibration of a radiocarbon determination using the IntCal curve (one interpretation, and five examples). Red curves represent the measured radiocarbon age probability; blue lines with shaded envelopes indicate the calibration curve and its 68.3% uncertainty. Grey histograms show the resulting calendar age probability distributions. Horizontal brackets mark the 68.3% and 95.4% calibrated ranges. Calibrations were performed in OxCal v4.4.


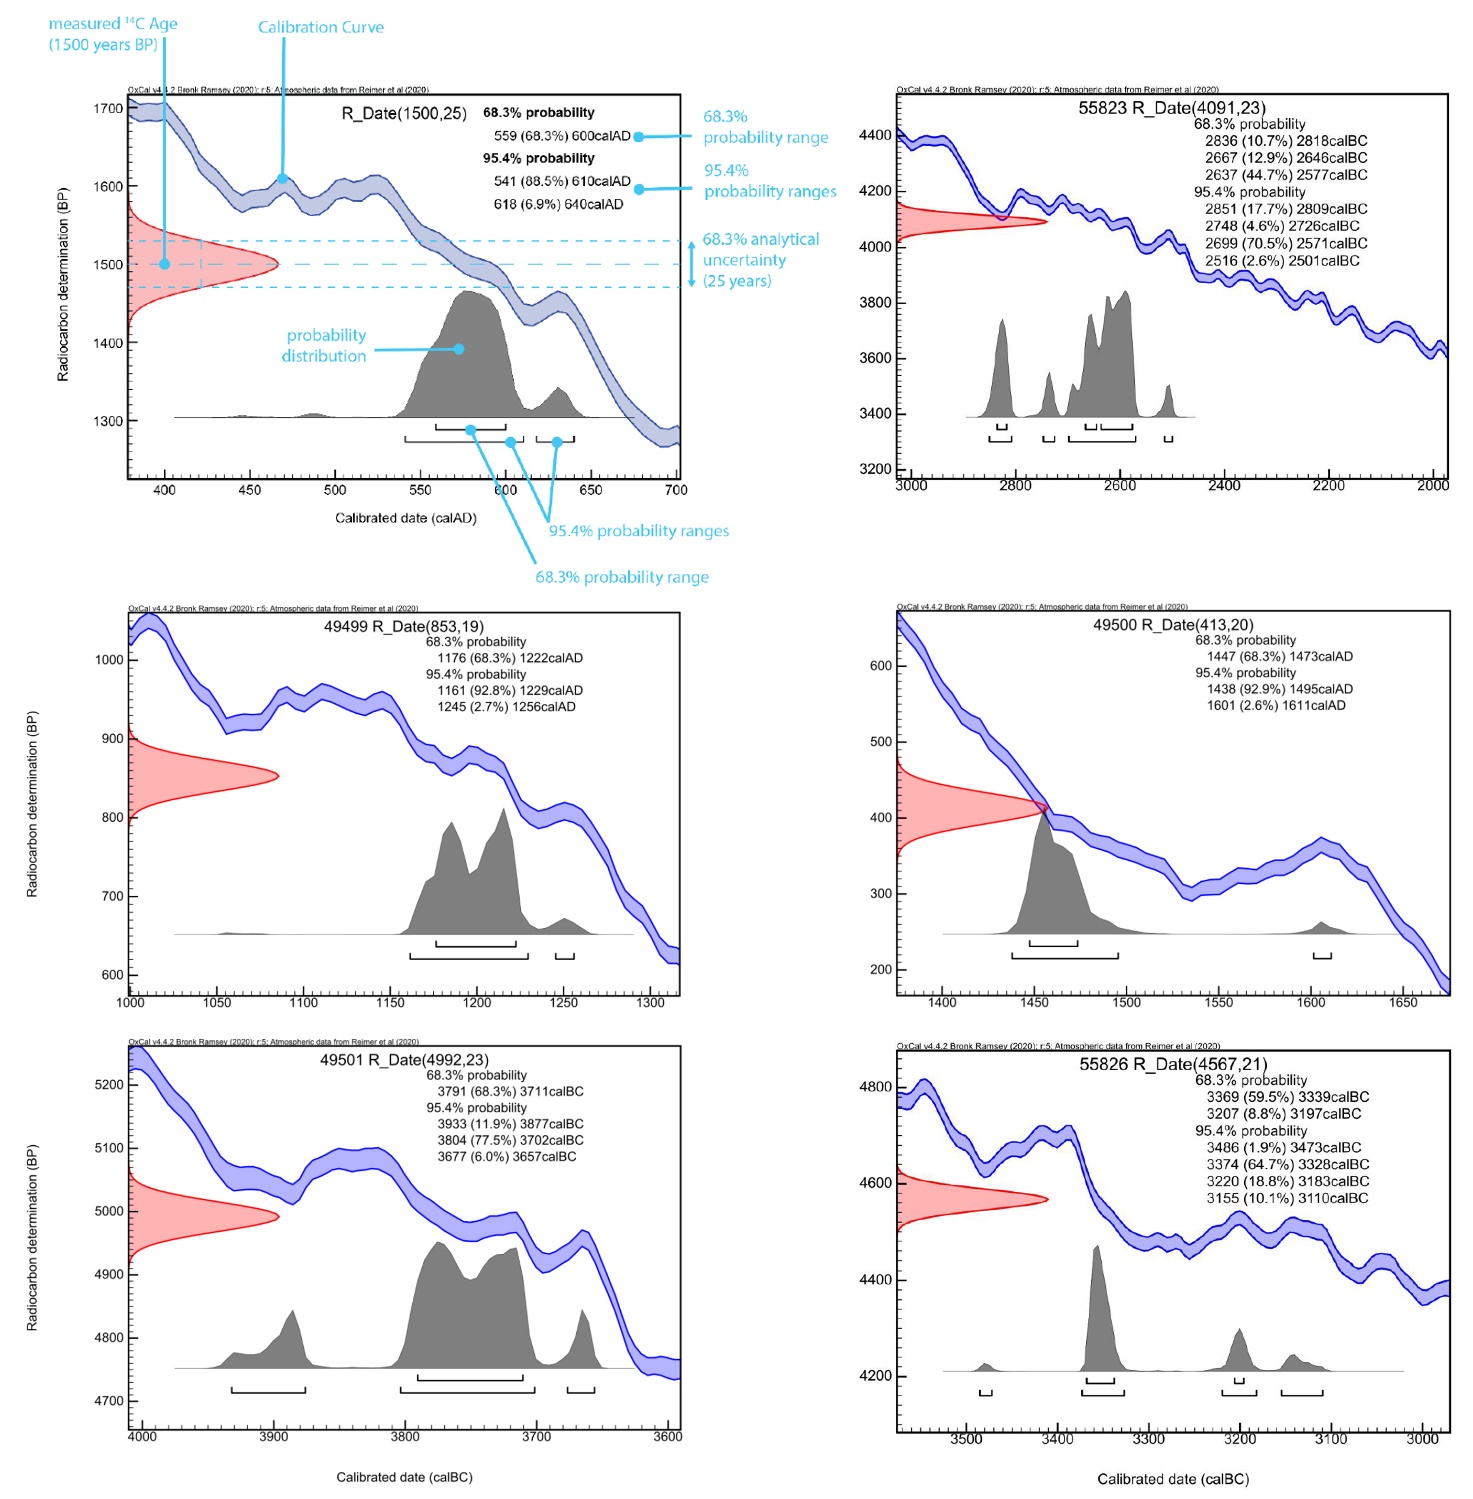


**Figure S2. Multivariate differentiation of coral and peat reef communities.** Principal Coordinates Analysis (PCoA) based on Bray-Curtis dissimilarity (%) to show community separation between coral and peat reefs across habitat quadrats, invertebrates, small fish, and megafauna. Points represent quadrats/sites, color-coded by reef type. ANOSIM and PERMANOVA results summarizing the strength and significance of differences. Significant values (*p* < 0.05) are in bold.


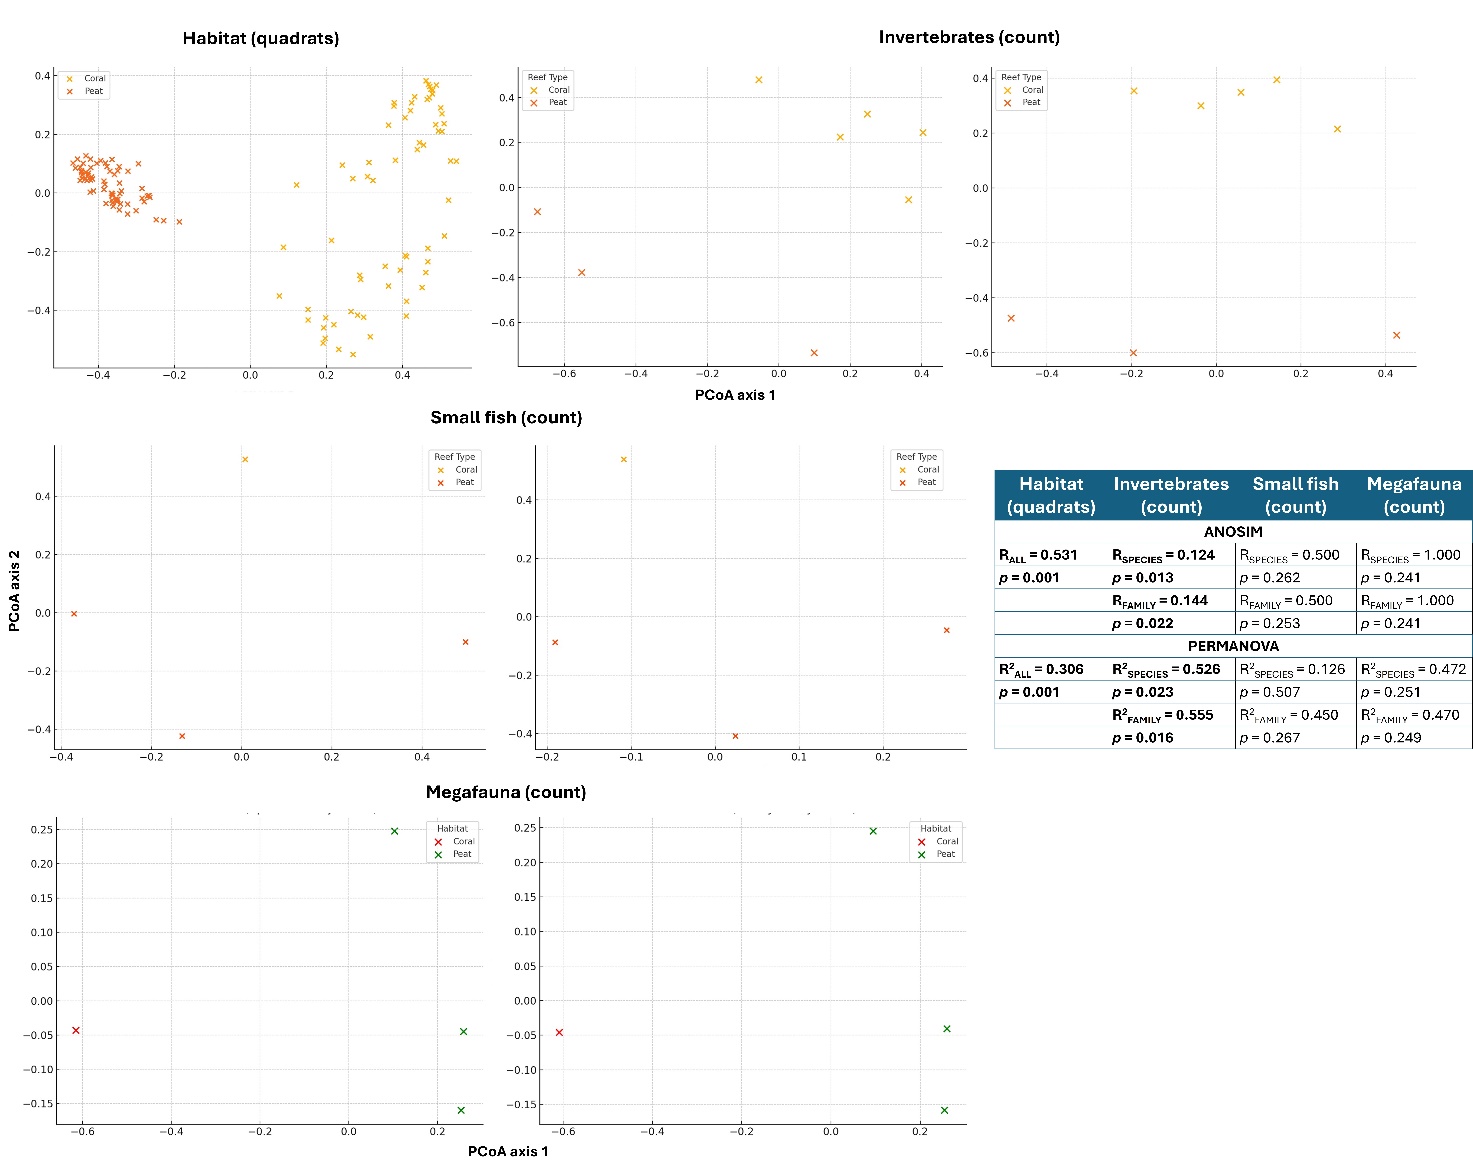


**Figure S3. Habitat and taxa drivers of dissimilarity between coral and peat reef systems.**SIMPER analysis showing the top 10 contributors to Bray-Curtis dissimilarity (%) between coral and peat reef habitats across four datasets: habitat quadrats, invertebrate, small fish counts, and megafauna counts. Bars indicate each habitat or taxon feature's percentage contribution to overall dissimilarity.


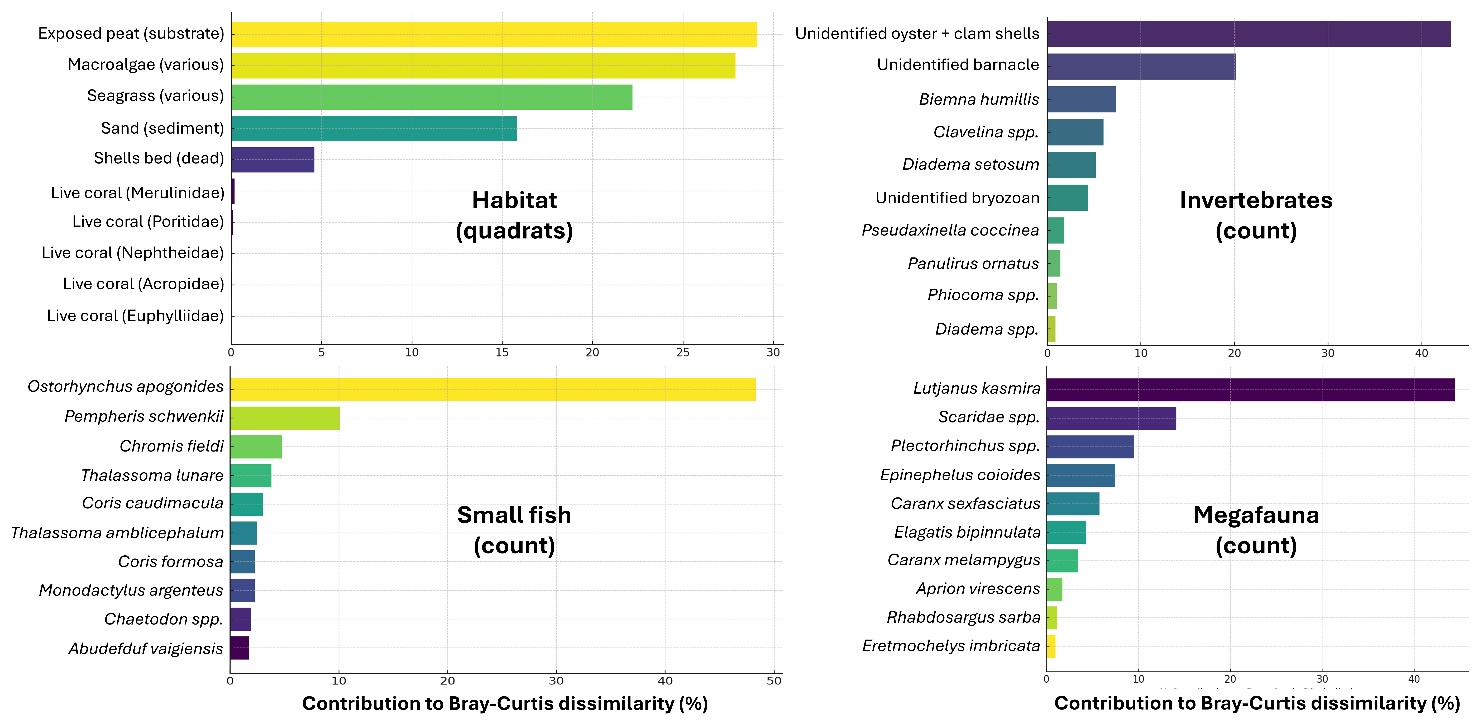


**Table S1. Raw datasets corresponding to the work conducted in the peat reef systems**. Snapshot tables of the full database used to understand the peat reef systems (sensor time-series, non-ecological data details, benthic quadrats, benthic invertebrates counts, small fish and megafauna surveys). All datasets are at the BCSS Ocean Observatory repository ([https://bcssmz.org/](https://bcssmz.org/ocean-observatory-mozambique/)) with DOI links <https://doi.org/10.82174/bcssmz.ocean.observatory.data.access>/ and <https://doi.org/10.82174/bcssmz.ocean.observatory.data.repository/>.


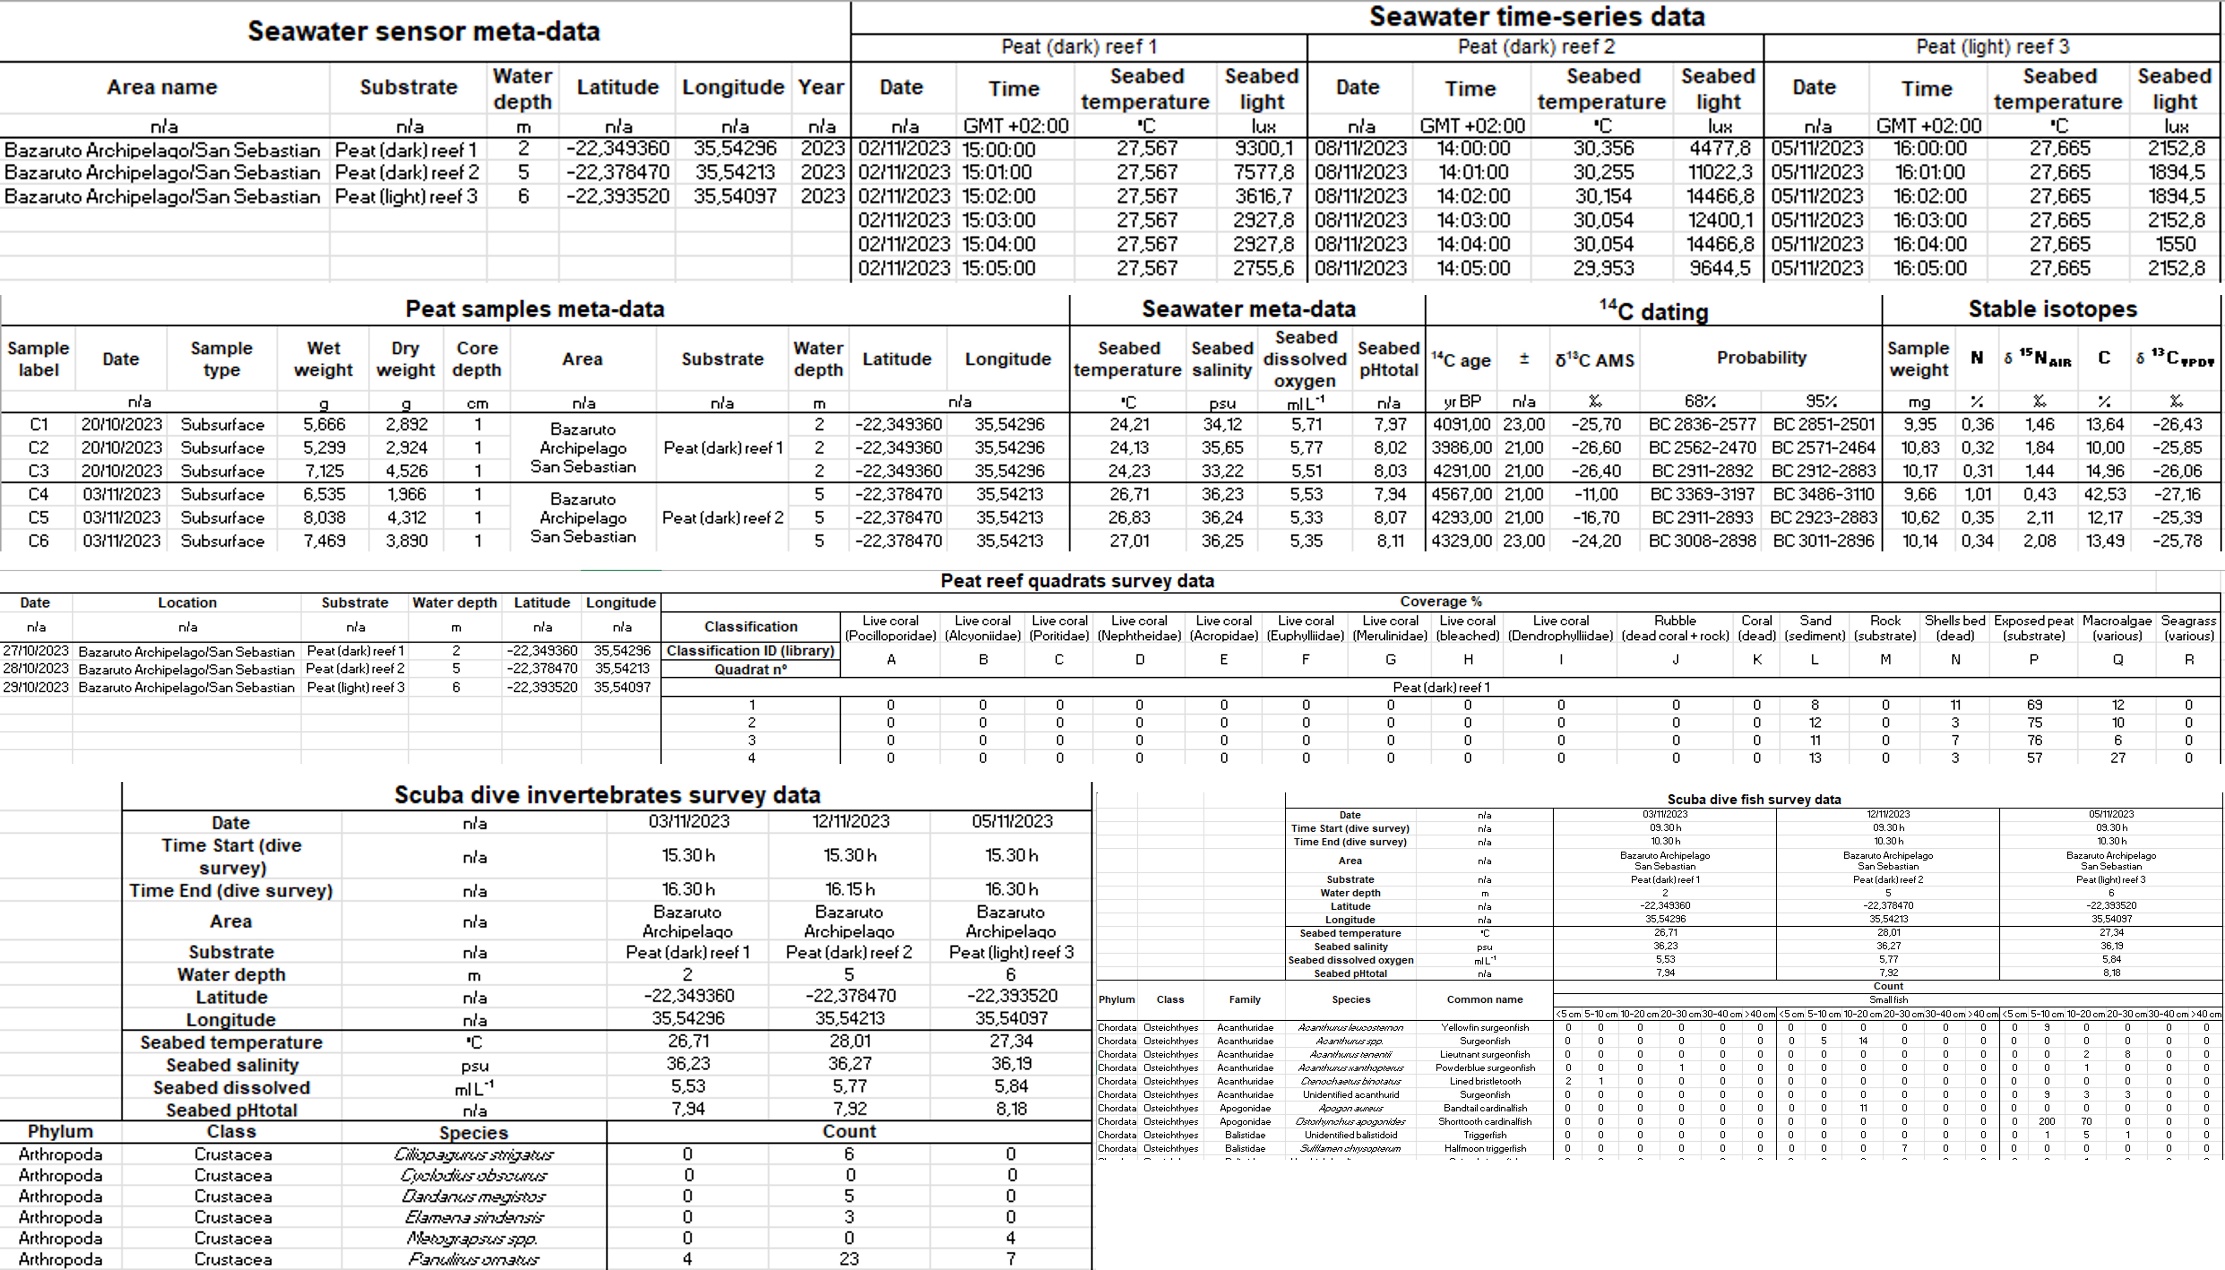


**Table S2. Raw datasets corresponding to the work conducted in the coral reef system**. Snapshot tables of the full database used to understand the coral reef system (sensor time-series, non-ecological data details, benthic quadrats, benthic invertebrates counts, small fish and megafauna surveys). All datasets are available at the BCSS Ocean Observatory repository ([https://bcssmz.org/](https://bcssmz.org/ocean-observatory-mozambique/)) with DOI links <https://doi.org/10.82174/bcssmz.ocean.observatory.data.access>/ and <https://doi.org/10.82174/bcssmz.ocean.observatory.data.repository/>.


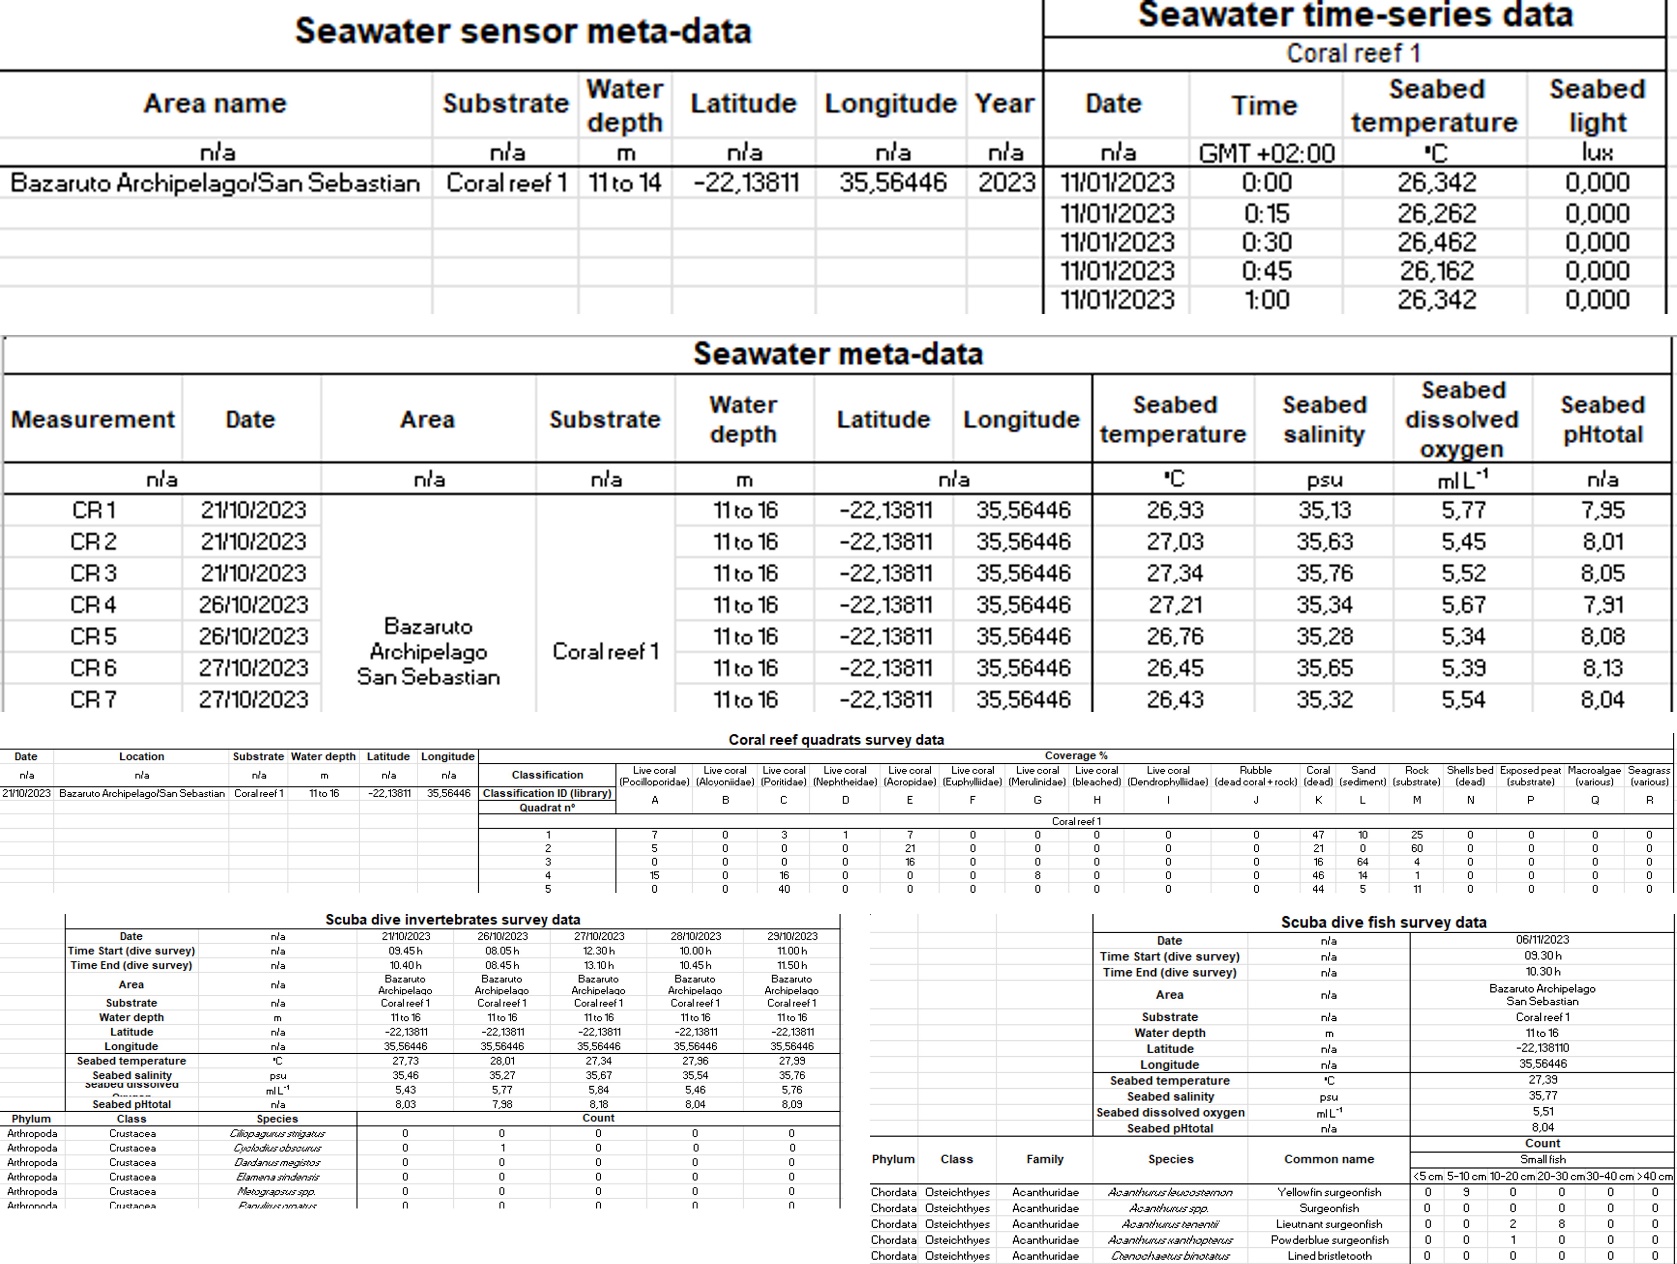

Supplement: Supplementary file 1 [file ac095fe08756af423cc3dcc3.docx]
